# Supplementary material for: Conditional knock out of N-WASP in keratinocytes causes skin barrier defects and atopic dermatitis-like inflammation
Source: PubMed Central journal article supplement (PMC5544743; doi:10.1038/s41598-017-07125-8), 2017-08-04

# Conditional knock out of N-WASP in keratinocytes causes skin barrier defects and atopic dermatitis-like inflammation

<sup>+</sup>Pazhanichamy KALAILINGAM<sup>1</sup>, <sup>+</sup> Hui Bing TAN<sup>1</sup>, Neeraj JAIN<sup>1</sup>, Ming Keat SNG<sup>1,2</sup>, Jeremy Soon Kiat CHAN<sup>1</sup>, Nguan Soon TAN<sup>1,2,3,4</sup> and Thirumaran THANABALU<sup>1\*</sup>

### Figure S1. Generation of N-WASP knockout mice in keratinocytes in skin

(A) Tail genomic PCR genotyping of 1<sup>st</sup> generation mice, (B) Tail genomic PCR genotyping of mice from second mating ( $N-WASP^{fl/fl}$  X  $N-WASP^{fl/WT}; K14-Cre$ ). Asterisk (\*) indicates homozygous,  $N-WASP^{fl/fl}; K14-Cre$  mice, (↑) indicates heterozygous,  $N-WASP^{fl/WT}; K14-Cre$  mice. (C) Tail genomic PCR representing the deletion product of exon 3 and 4 of N-WASP gene. (D) H & E stained esophagus (n=5) sections of P23,  $N-WASP^{K14KO}$  and control mice (E) Bacterial colonies (*S. aureus*) obtained from ear swab samples of  $N-WASP^{K14KO}$  mice were higher compared to ear swab samples from control mice. (F) PCR amplification of *Staphylococcal* enterotoxin B (SEB) gene confirmed the identity of yellow colonies as *S. aureus* (n=3). Results are mean ± SEM \*\*\*  $p < 0.001$ , \*\*  $p < 0.01$

### Figure S2. Loss of N-WASP expression in keratinocytes caused hyperproliferation of keratinocytes in epidermis of $N-WASP^{K14KO}$ mice skin

(A) H & E stained dorsal skin ( $N-WASP^{fl/fl}$ ), heterozygous ( $N-WASP^{fl/WT}; K14-Cre$ ) and  $N-WASP^{K14KO}$  ( $N-WASP^{fl/fl}; K14-Cre$ ), tail (B) and ear (C) sections of  $N-WASP^{K14KO}$  and control mice on 19<sup>th</sup> day (n=6). Quantification of epidermal thickening in skin (D), ear (E) and tail (F) of control mice and  $N-WASP^{K14KO}$  mice skin sections (n=6). (G) PCNA immunostaining of paraffin embedded dorsal skin sections of control and  $N-WASP^{K14KO}$  mice (P19) and quantification of PCNA positive cells (n=3). Results are mean ± SEM \*\*\*  $p < 0.001$ , \*\*  $p < 0.01$ , \*  $p < 0.05$

**Figure S3. Ablation of N-WASP expression in keratinocytes does not affect differentiation of epidermis**

Immunostaining of differentiation markers, cytokeratin 10 (early) (A), involucrin (intermediate) (B), transglutaminase (terminal) (C) and cytokeratin 14 (D) in paraffin embedded skin tissue of N-WASP<sup>K14KO</sup> and control mice on P23 (n=3). Western blot analysis of expression of differentiation marker proteins (E) on P23 (n=3).

**Figure S4. Increased infiltration of immune cells in N-WASP<sup>K14KO</sup> mice skin**

(A) Toluidine blue staining showed significant increased infiltration of mast cells in dermis of skin in N-WASP<sup>K14KO</sup> mice compared to P19 control mice (n=3). Immunostaining for CD3 (n=3) (B) CD4 (n=3) (C) CD11b (n=3) (D) and Ly6G/6c (n=3) (E) showed a significant increase in immune cells in dermal layer of N-WASP<sup>K14KO</sup> mice compared to control mice on 19<sup>th</sup> day. (↑) indicates mast cells, CD3, CD4, CD11b and Ly6G/ly6C cells. Results are mean ± SEM \*\*\*  $p < 0.001$ , \*\*  $p < 0.01$ .

**Figure S5. Expression of N-WASP in healthy controls and atopic eczema patient samples**

N-WASP expression levels in healthy controls and atopic eczema patients samples (The Data retrieved from GEO database (ID: GSE6012, Pubmed ID: 16918518, Probe ID for N-WASP: 205809\_s\_at) (n=10).

**Figure S6. Full length western blot images of Fig. 1A, 5C and 8I**

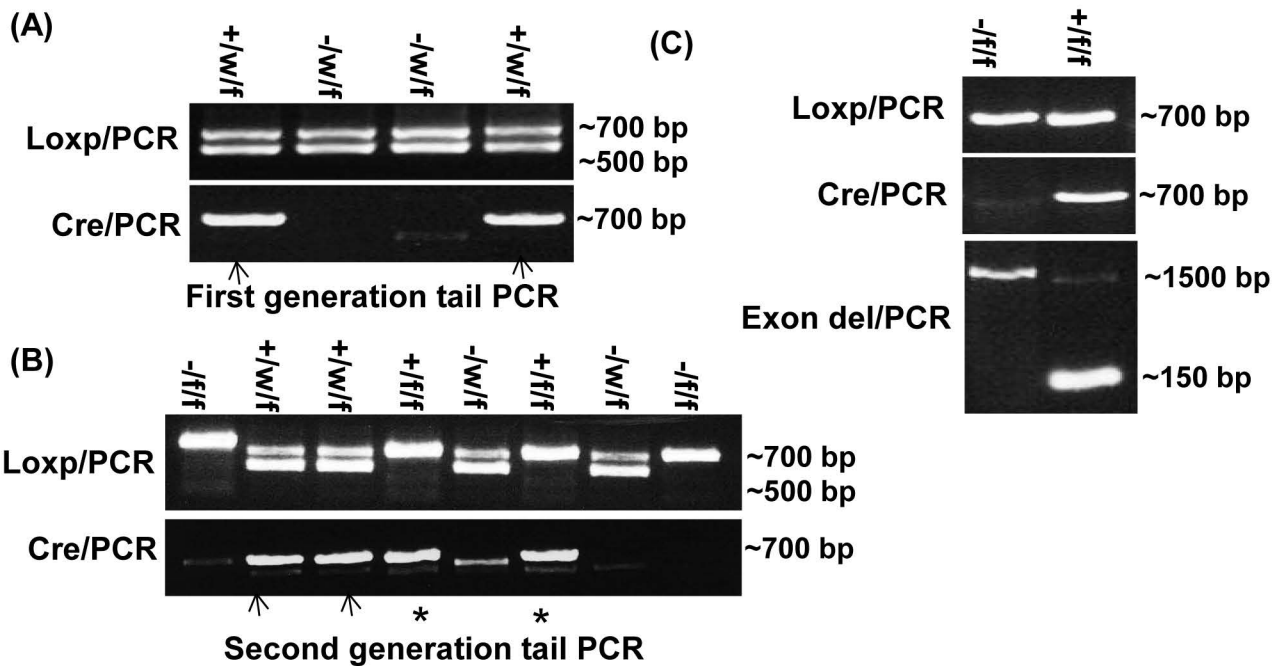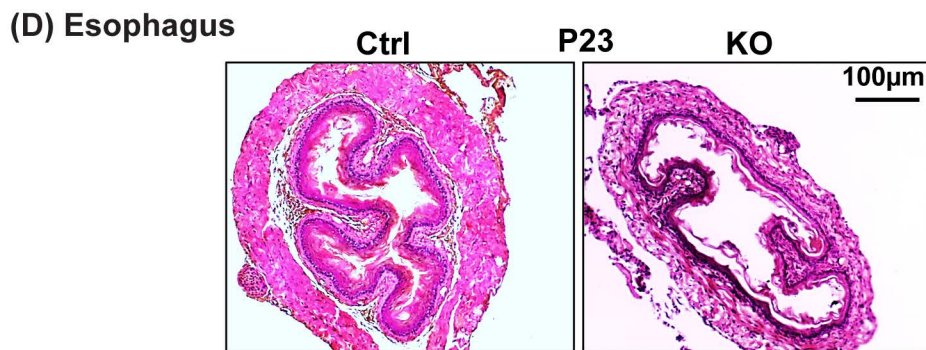

**(E) Quantification of *S.aureus***

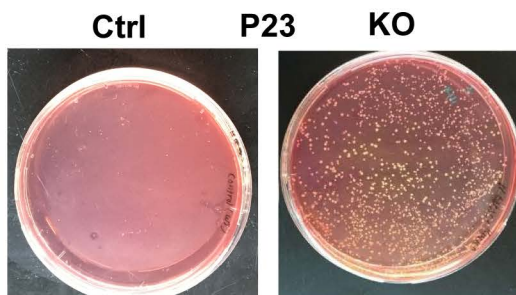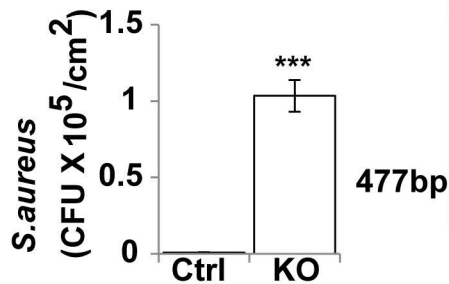

**(F) PCR for *S.aureus*-SEB**

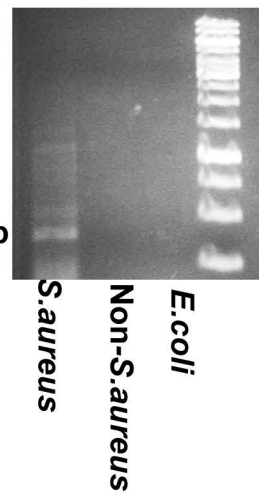

(A) Dorsal skin

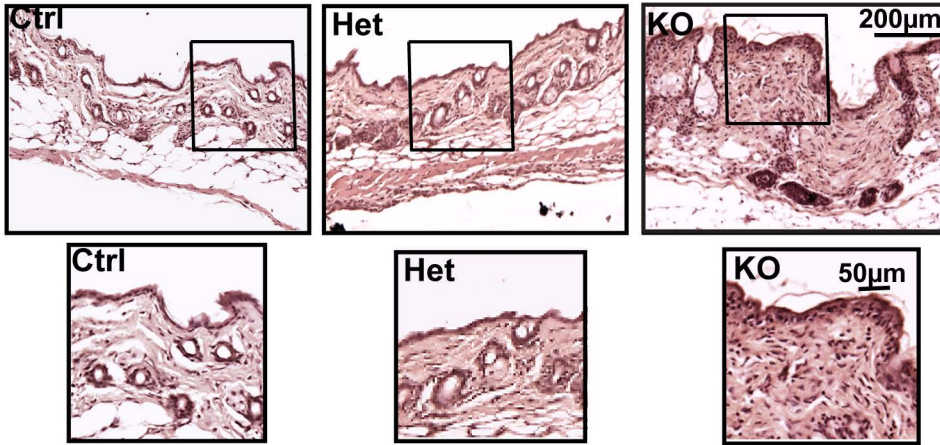

(D) Dorsal skin

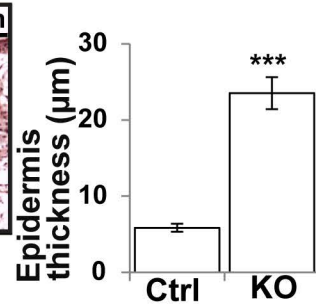

(B) Tail skin

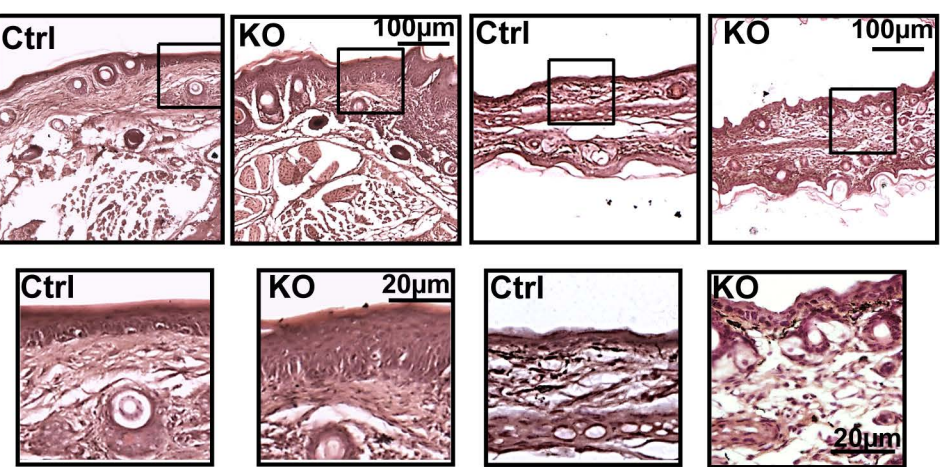

(E) Ear skin

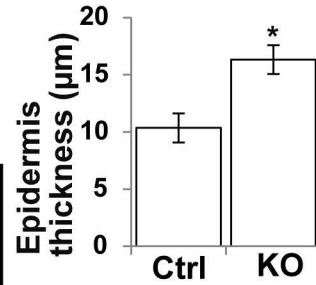

(C) Ear skin

(F) Tail skin

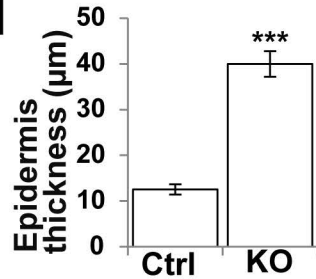

(G)

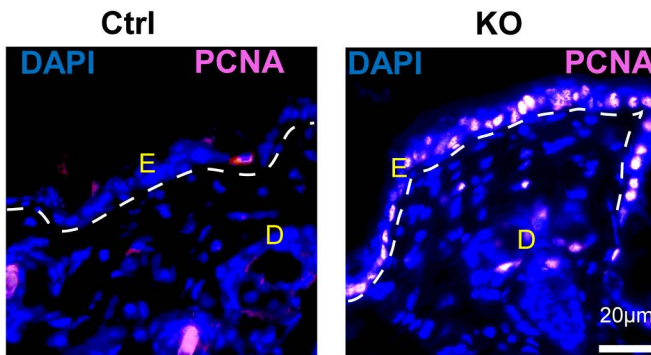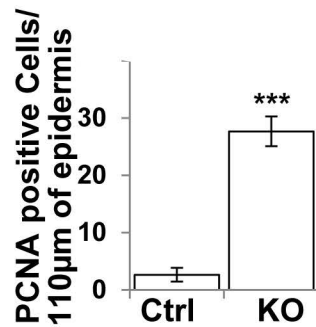

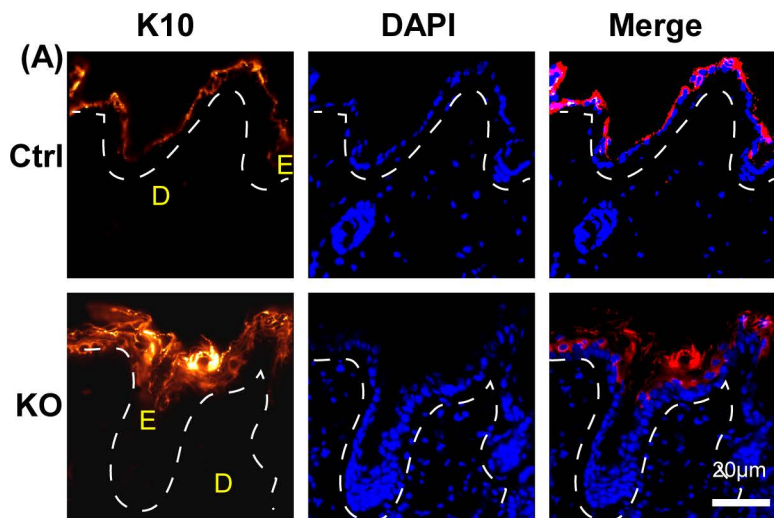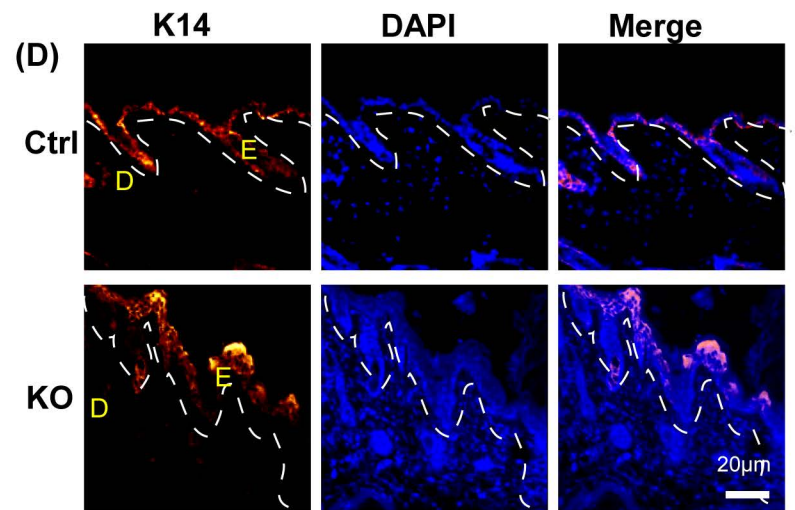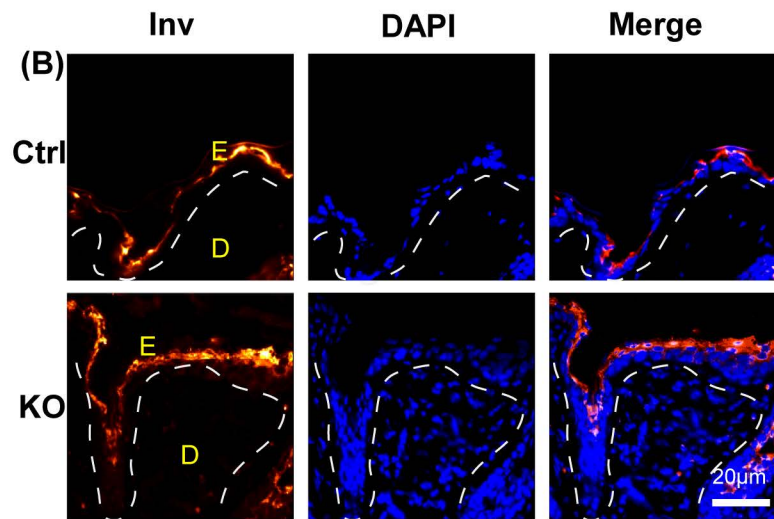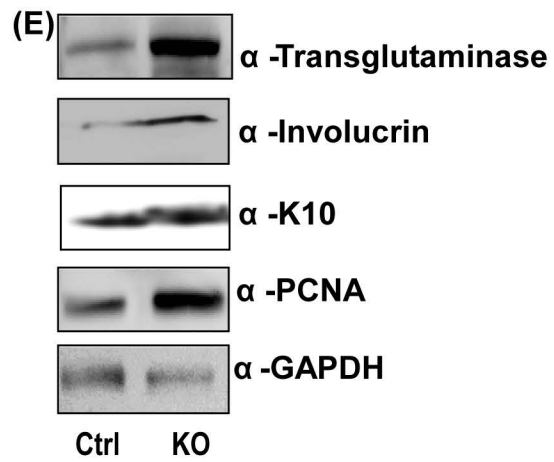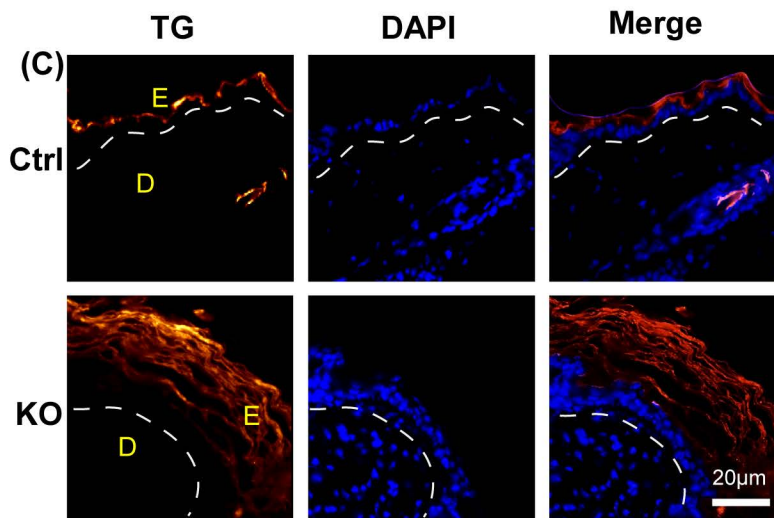

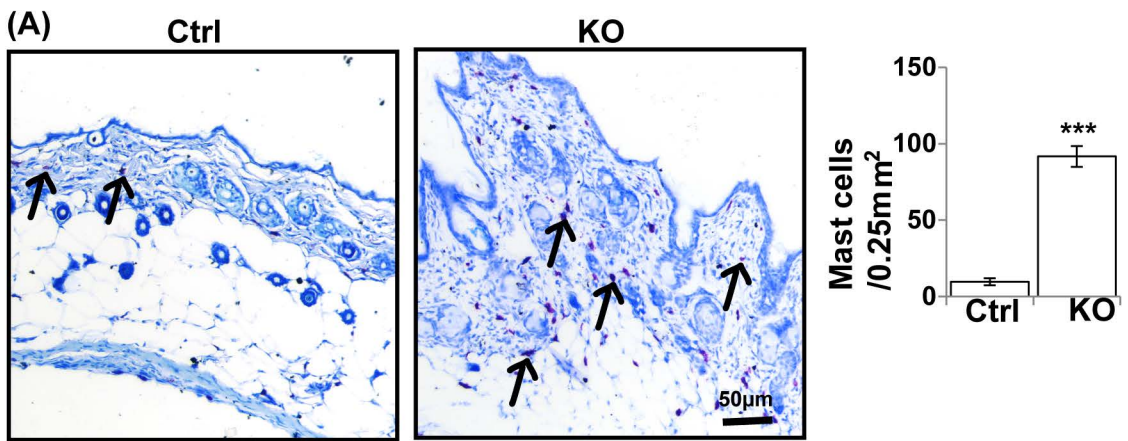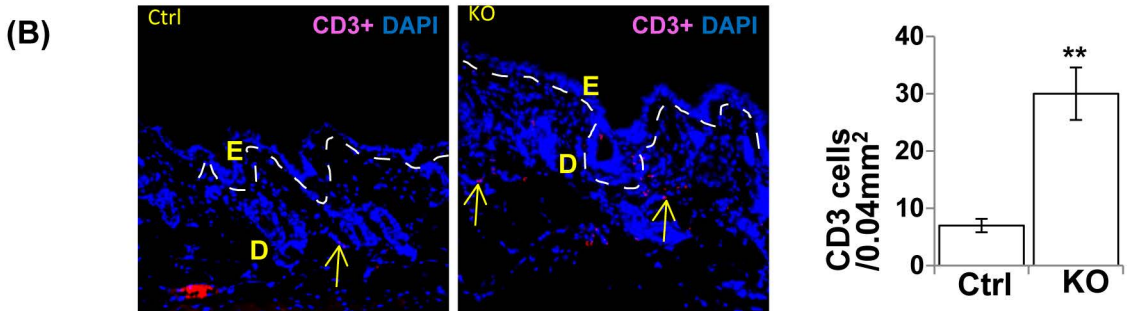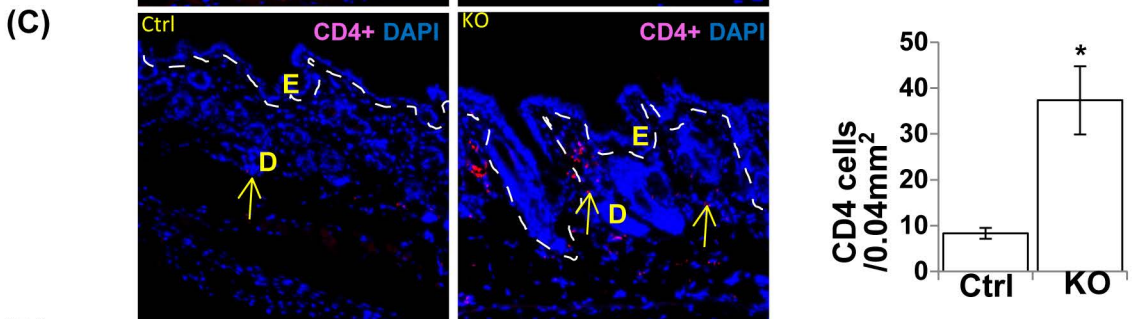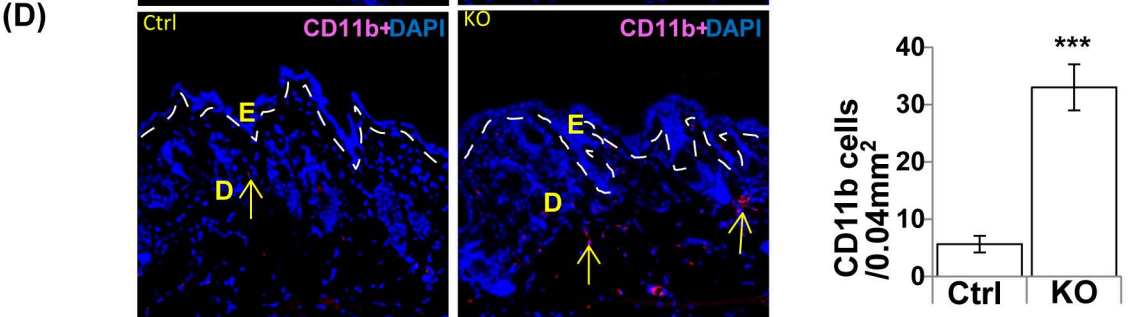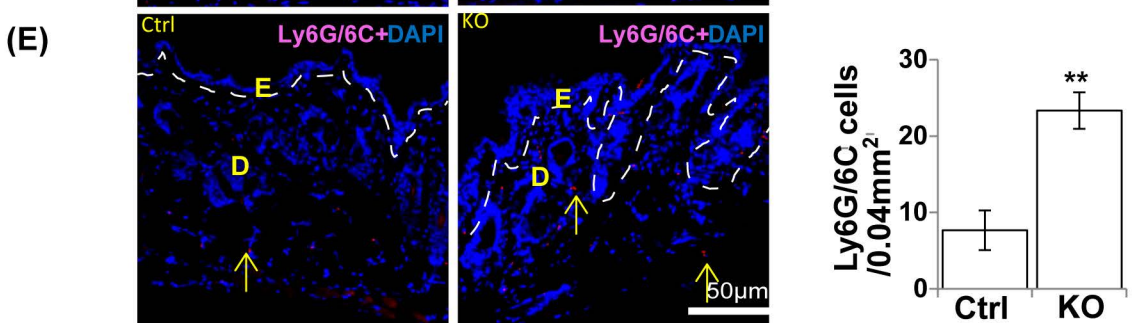

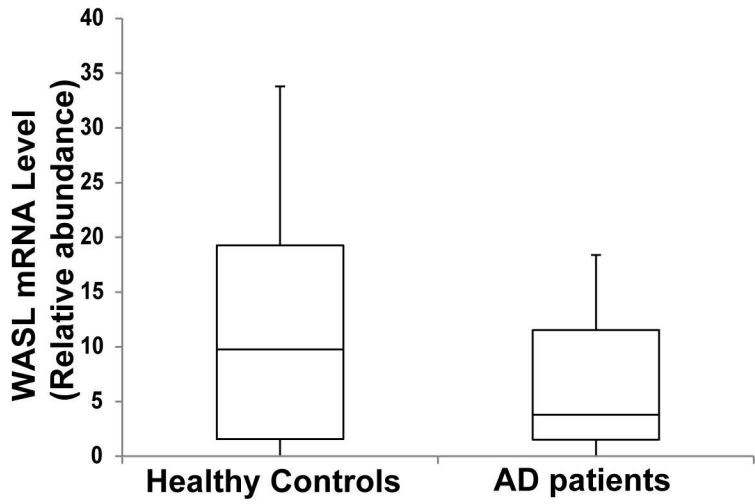



(A)

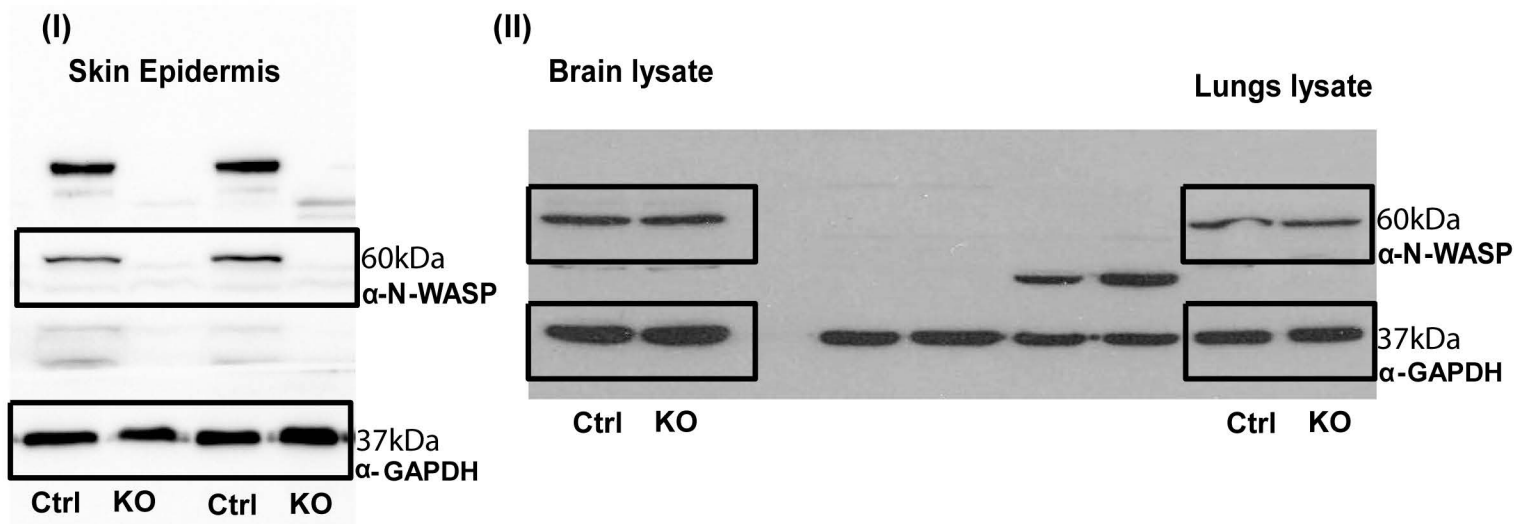

(B)

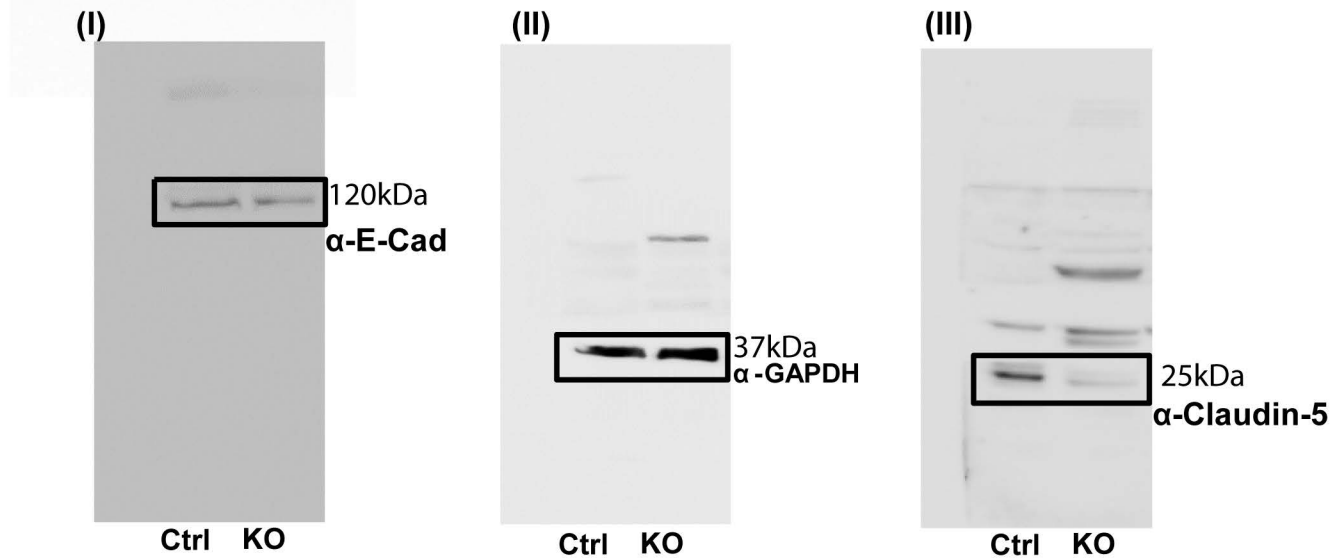

(C)

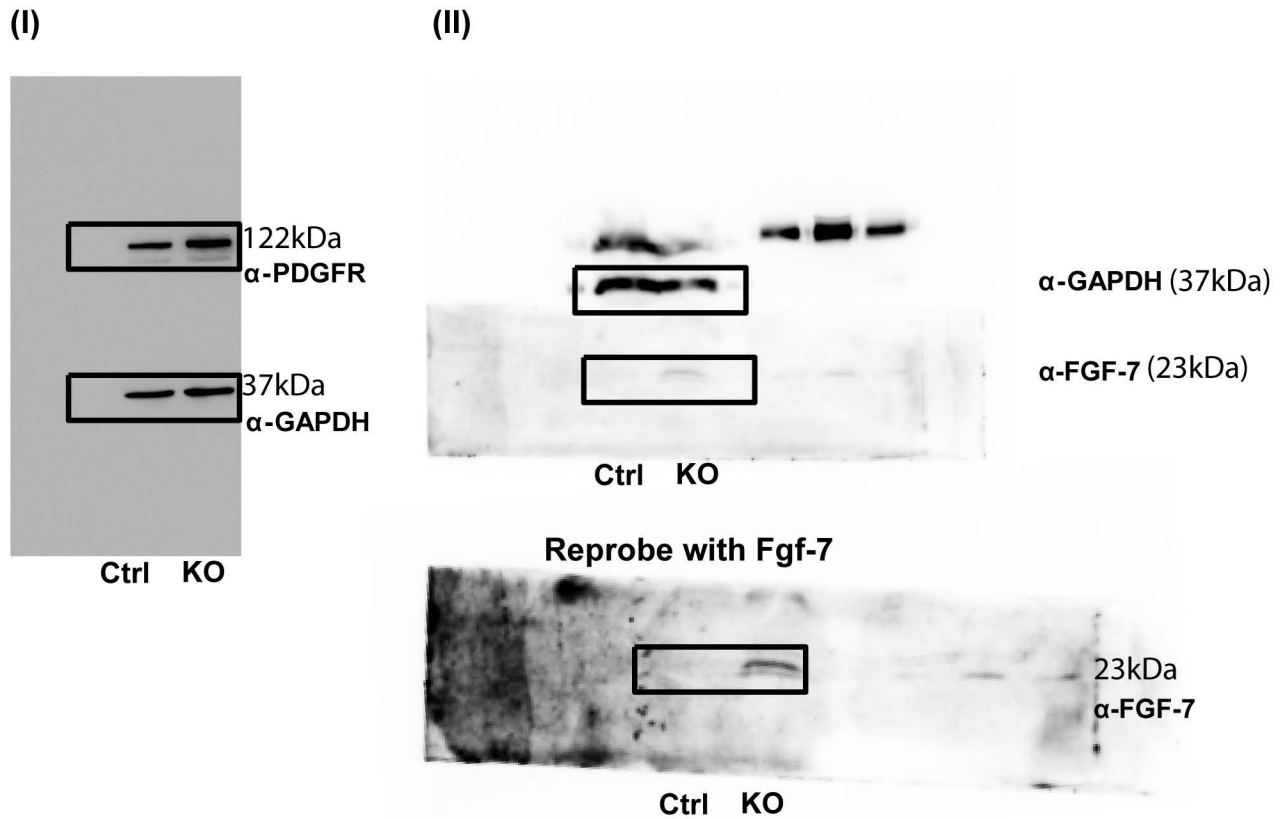

Supplement: 41598_2017_7125_MOESM1_ESM.pdf [file 41598_2017_7125_MOESM1_ESM.pdf]
